# Supplementary material for: Poplar protease inhibitor expression differs in an herbivore specific manner
Source: PubMed Central journal article supplement (PMC8033671; doi:10.1186/s12870-021-02936-4), 2021-04-09
Supplement: 12870_2021_2936_MOESM1_ESM.pdf [file 12870_2021_2936_MOESM1_ESM.pdf]

**Supplementary Material:**

**Title: Poplar protease inhibitor expression differs in an herbivore specific manner**

**Authors:** Franziska Eberl<sup>1\*</sup>, Thomas Fabisch<sup>1</sup>, Katrin Luck<sup>1</sup>, Tobias G. Köllner<sup>1</sup>, Heiko Vogel<sup>2</sup>, Jonathan Gershenzon<sup>1</sup>, Sybille B. Unsicker<sup>1</sup>

<sup>1</sup> Max Planck Institute for Chemical Ecology (MPI-CE), Department of Biochemistry, Hans-Knöll-Str. 8, 07745 Jena

<sup>2</sup> MPI-CE, Department of Entomology, Hans-Knöll-Str. 8, 07745 Jena

\*Corresponding author: Email: feberl@ice.mpg.de; Phone: +49 (0)3641 57 1337

**Table S1.** Feeding damage by the three herbivores and trypsin-inhibiting activity in poplar.

**Table S2.** Primer sequences used for cloning and qRT-PCR.

**Table S3.** Differential expression of contigs annotated as protease inhibitors in the transcriptome of black poplar leaves.

**Table S4.** Nomenclature of KTI homologs in this and other studies.

**Table S5.** Quantification cycles of the qRT-PCR analysis for individual *KTI* genes.

**Table S1.** Feeding damage on black poplar leaves after 2 d of herbivore feeding by *Lymantria dispar*, *Amata mogadorensis* and *Phratora vulgatissima* and trypsin-inhibiting activity in these leaves. Shown is the leaf area loss (% of total leaf area) and inhibitory activity (equivalents to soybean trypsin inhibitor (STI),  $\mu\text{g STI g}^{-1}$  dry weight (DW)) as mean  $\pm$  SEM ( $n = 6$ ). The three groups were not found to be significantly different (ANOVA:  $F_{(2)} = 0.762$ ;  $P = 0.484$ ). Data are taken from Fabisch *et al.* (2019), and the parameters re-calculated for the six replicates selected for this study.

| <b>Herbivore</b>       | <b>Damage (%)</b> | <b>KTI activity (<math>\mu\text{g g}^{-1}</math> DW)</b> |
|------------------------|-------------------|----------------------------------------------------------|
| <i>L. dispar</i>       | 19.0 $\pm$ 5.7    | 95.7 $\pm$ 12.9                                          |
| <i>A. mogadorensis</i> | 12.3 $\pm$ 4.8    | 93.1 $\pm$ 26.4                                          |
| <i>P. vulgatissima</i> | 12.0 $\pm$ 1.6    | 257.6 $\pm$ 23.2                                         |

**Table S2.** Sequences of primers used for full-length cloning (FL) and gene expression analysis via quantitative real-time PCR (qRT-PCR). Primer sequences for *Actin* were taken from Ramirez-Carvajal *et al.* 2008<sup>1</sup>.

| Usage   | Name         | Forward primer (5' → 3')  | Reverse primer (5' → 3')       |
|---------|--------------|---------------------------|--------------------------------|
| FL      | SQ16949      | ATGAAGATCACTAACGTTCTAG    | CTATTCATCTGGTTCAATCATAAC       |
| FL      | SQ33325 (a)* | CACCCATGTGTCTGATGTGG      | TCAATATGCATCTGGTTTCG           |
|         | SQ33325 (b)* | ATGGAGATCACTAAATTTCTAGG   | GTATCCTTCCGTTGTTGGACT          |
| FL      | SQ33325-2    | ATGGAGATCACTAAATTTCTAGG   | TCAATATGCATCTGGTTTCG           |
| FL      | SQ14956      | ATGAAGATCACTAAATTTCTAGGG  | TTATGTGCTCTCAATGCG             |
| FL      | SQ36485      | ATGAAGATCACCAAGTTTGT      | TCAGGAGCTTTTATCTGC             |
| FL      | SQ2215       | ATGAAGATCTCTAACTTTCTAGTG  | TTACACCATTTTATACTCTATTTTAGA    |
| FL      | SQ1996       | ATGAAGATTACTAACTTTCTAGTGC | TTACATCATTTTATACTCTATTTTAGAAGA |
| FL      | VP33729      | ATGAAGTCTACATTGTTGGT      | TCATATGGATGAACTTAAAGGC         |
| FL      | SQ6530       | ATGAAGTCTACATTGTTGGT      | TCATATGGATGAACTTAAAGGC         |
| FL      | SQ287        | ATGAAGAATATTATGTTACTACCCC | TTACACAACAGCTTTTAATCC          |
| qRT-PCR | SQ2215       | TTACTGTCTCCAATGAGCCATG    | ATGAGCAGATGGGTTCGG             |
| qRT-PCR | SQ287        | GCGTTACAGGTACACCAG        | ACAAATGAGCCTCCCACG             |
| qRT-PCR | SQ36485      | ACAACCTTTGCGGTCTCTG       | CATTGTTGGCCTCAACTCC            |
| qRT-PCR | SQ6530       | TTCGGACCTGTTACAAGGC       | GAAACTAGCTTGTACCCTATGC         |
| qRT-PCR | SQ1580       | GTTGTGTTTTCTCCAATGAGCG    | GGACGCATGAGCATTACAT            |
| qRT-PCR | VP33729      | CTAATATGCCAGCCTTCTC       | GTTGGACCAGTTACAAGGT            |
| qRT-PCR | SQ34879      | CACCCATGTGTCTGATGTG       | GAAGAGGGCCGACATTGG             |
| qRT-PCR | SQ8996       | GCGCAACCGGTTTAAACC        | GATTCAATTCAACAGCCAAAG          |
| qRT-PCR | Actin        | CCCATTGAGCACGGTATTGT      | TACGACCACTGGCATAACAGG          |

\* two primer pairs were used to amplify the gene in two parts. <sup>1</sup> Ramirez-Carvajal GA, Morse AM, Davis JM. 2008. *New Phytologist* **177**:77–89.

**Table S3.** Contigs in the transcriptome of black poplar leaves damaged by *L. dispar* and *P. vulgatissima* that were annotated as protease inhibitors, and their differential expression (ratio of RPKM values) compared to the respective undamaged control treatments (Ctrl 1 and 2). Contigs are sorted by their regulation pattern (up-regulated, differentially regulated, down-regulated upon herbivory) and further by the *P*-value of 'Ctrl 1 vs. *L. dispar*' in descending significance. Annotations including 'Kunitz' are marked in bold; for these contigs, the gene names used in this study are given (PnKTI).

| Name                               |                  |                                                               | <u>Ctrl 1 vs. <i>L. dispar</i></u> |          | <u>Ctrl 2 vs. <i>P. vulgatissima</i></u> |           |
|------------------------------------|------------------|---------------------------------------------------------------|------------------------------------|----------|------------------------------------------|-----------|
| ID                                 | PnKTI            | Sequence Annotation                                           | Diff. expr.                        | <i>P</i> | Diff. expr.                              | <i>P</i>  |
| <i>Up-regulated upon herbivory</i> |                  |                                                               |                                    |          |                                          |           |
| SQ1996                             | <i>PnKTI A6</i>  | <b>Kunitz trypsin inhibitor ti3</b>                           | 4.511 up                           | 0.00193  | 7.782 up                                 | 0.0000667 |
| SQ287                              | <i>PnKTI D2</i>  | <b>Kunitz trypsin inhibitor</b>                               | 1547.915 up                        | 0.00318  | 251.880 up                               | 0.00045   |
| SQ14956                            | <i>PnKTI A14</i> | <b>Kunitz trypsin inhibitor</b>                               | 1340.240 up                        | 0.00828  | 3121.864 up                              | 0.0000843 |
| SQ6530                             | <i>PnKTI B5</i>  | <b>Kunitz trypsin inhibitor</b>                               | 139.616 up                         | 0.00852  | 127.805 up                               | 0.00505   |
| SQ36485                            | <i>PnKTI A7</i>  | <b>Kunitz-type protease inhibitor kpi-</b>                    | 1512.845 up                        | 0.00916  | 2087.716 up                              | 0.0000093 |
| SQ27194                            | <i>PnKTI A12</i> | <b>Kunitz trypsin inhibitor 3</b>                             | 12.698 up                          | 0.0105   | 2.847 up                                 | 0.0288    |
| SQ8430                             |                  | inter-alpha-trypsin inhibitor heavy                           | 5.710 up                           | 0.0138   | 3.448 up                                 | 0.0242    |
| SQ16949                            | <i>PnKTI A2</i>  | <b>Kunitz-type protease inhibitor kpi-</b>                    | 1609.628 up                        | 0.0141   | 2529.060 up                              | 0.0000375 |
| SQ37196                            |                  | inter-alpha-trypsin inhibitor heavy                           | 5.611 up                           | 0.0146   | 3.428 up                                 | 0.0113    |
| SQ17376                            |                  | inter-alpha-trypsin inhibitor heavy                           | 6.847 up                           | 0.0152   | 4.168 up                                 | 0.012     |
| SQ8431                             |                  | inter-alpha-trypsin inhibitor heavy                           | 4.228 up                           | 0.0165   | 2.870 up                                 | 0.00411   |
| SQ24859                            |                  | inter-alpha-trypsin inhibitor heavy                           | 5.591 up                           | 0.0218   | 2.972 up                                 | 0.0166    |
| SQ2215                             | <i>PnKTI A15</i> | <b>Kunitz trypsin inhibitor ti3</b>                           | 40.816 up                          | 0.0229   | 72.350 up                                | 0.000316  |
| SQ33325                            | <i>PnKTI A13</i> | <b>Kunitz-type protease inhibitor KPI-</b>                    | 24381.159 up                       | 0.0247   | 7431.743 up                              | 0.00283   |
| SQ49470                            |                  | inter-alpha-trypsin inhibitor heavy                           | 8.483 up                           | 0.0832   | 4.155 up                                 | 0.065     |
| SQ24955                            | <i>PnKTI B2</i>  | <b>Kunitz trypsin protein inhibitor 3</b>                     | 38.630 up                          | 0.188    | 3.239 up                                 | 0.277     |
| SQ43060                            | <i>PnKTI C1</i>  | <b>truncated Kunitz trypsin inhibitor family protein</b>      | 40.465 up                          | 0.192    | 58.511 up                                | 0.0764    |
| SQ6918                             |                  | protease inhibitor seed storage lipid transfer family protein | 2.266 up                           | 0.227    | 1.814 up                                 | 0.00185   |
| SQ61412                            |                  | protease inhibitor seed storage lipid transfer family protein | 14.550 up                          | 0.392    | 153.666 up                               | 0.0619    |
| VP33729                            | <i>PnKTI B1</i>  | <b>Kunitz trypsin inhibitor 4</b>                             | 114,626 up                         | 0,409    | na                                       | na        |
| SQ47062                            |                  | inter-alpha-trypsin inhibitor heavy                           | 2.573 up                           | 0.441    | 2.334 up                                 | 0.584     |
| SQ49510                            | <i>PnKTI C3</i>  | <b>truncated Kunitz trypsin inhibitor family protein</b>      | 14.149 up                          | 0.458    | 40.486 up                                | 0.228     |
| SQ22824                            |                  | protease inhibitor seed storage lipid transfer family protein | 7.775 up                           | 0.489    | 1.674 up                                 | 0.344     |
| SQ10660                            |                  | protease inhibitor seed storage lipid transfer family protein | 1.874 up                           | 0.507    | 1.953 up                                 | 0.178     |

| Name                                           |                 |                                                                  | <u>Ctrl 1 vs. <i>L. dispar</i></u> |            | <u>Ctrl 2 vs. <i>P. vulgatissima</i></u> |          |
|------------------------------------------------|-----------------|------------------------------------------------------------------|------------------------------------|------------|------------------------------------------|----------|
| ID                                             | PnKTI           | Sequence Annotation                                              | Diff. expr.                        | <i>P</i>   | Diff. expr.                              | <i>P</i> |
| SQ23804                                        | <i>PnKTI C6</i> | <b>truncated Kunitz trypsin inhibitor family protein</b>         | 7.688 up                           | 0.549      | 3.869 up                                 | 0.735    |
| SQ172                                          | <i>PnKTI C7</i> | <b>truncated Kunitz trypsin inhibitor family protein</b>         | 1.778 up                           | 0.552      | 12.017 up                                | 0.0805   |
| SQ56957                                        | <i>PnKTI C5</i> | <b>truncated Kunitz trypsin inhibitor family protein</b>         | 4.550 up                           | 0.747      | 3.794 up                                 | 0.765    |
| SQ21088                                        |                 | protease inhibitor seed storage lipid transfer family protein    | 1.224 up                           | 0.875      | 1.398 up                                 | 0.539    |
| SQ33797                                        |                 | serine protease inhibitor                                        | 1.229 up                           | 1          | 3.318 up                                 | 0.785    |
| <i>Differentially regulated upon herbivory</i> |                 |                                                                  |                                    |            |                                          |          |
| SQ29472                                        |                 | serine-type endopeptidase inhibitor                              | 108.536 down                       | 0.00000369 | 4.379 up                                 | 0.756    |
| SQ47318                                        |                 | cysteine proteinase inhibitor 12-like                            | 1.434 down                         | 0.205      | 1.439 up                                 | 0.633    |
| SQ10062                                        |                 | cysteine protease inhibitor                                      | 1.306 up                           | 0.324      | 1.004 down                               | 1        |
| SQ26391                                        |                 | protease inhibitor seed storage lipid transfer family protein    | 1.527 up                           | 0.858      | 1.583 down                               | 0.608    |
| SQ17957                                        |                 | inter-alpha-trypsin inhibitor heavy chain-related family protein | 1.090 down                         | 0.911      | 1.231 down                               | 0.658    |
| SQ12658                                        |                 | cysteine proteinase inhibitor                                    | 1.001 up                           | 1          | 1.176 down                               | 0.756    |
| SQ18761                                        |                 | cysteine proteinase inhibitor                                    | 1.046 up                           | 1          | 1.031 down                               | 1        |
| <i>Down-regulated upon herbivory</i>           |                 |                                                                  |                                    |            |                                          |          |
| SQ64031                                        |                 | cysteine proteinase inhibitor b-like                             | 5.168 down                         | 0.0282     | 3.143 down                               | 0.0767   |
| SQ7576                                         |                 | cysteine proteinase inhibitor 12-like                            | 1.318 down                         | 0.0655     | 1.923 down                               | 0.103    |
| SQ35734                                        |                 | subtilisin inhibitor                                             | 1.744 down                         | 0.142      | 2.001 down                               | 0.168    |
| SQ7450                                         |                 | cysteine proteinase inhibitor                                    | 1.596 down                         | 0.22       | 1.370 down                               | 0.214    |
| SQ52953                                        |                 | cysteine proteinase inhibitor 12-like                            | 1.232 down                         | 0.509      | 1.259 down                               | 0.663    |
| SQ7577                                         |                 | cysteine inhibitor 1                                             | 1.140 down                         | 0.6        | 1.262 down                               | 0.174    |
| SQ34850                                        |                 | inhibitor of trypsin and hageman factor-like protein             | 1.710 down                         | 0.715      | 1.666 down                               | 0.658    |
| SQ17958                                        |                 | inter-alpha-trypsin inhibitor heavy chain-related family protein | 1.058 down                         | 0.851      | 1.095 down                               | 0.68     |

na - not available; this contig and its expression was taken from another transcriptome of the same *P. nigra* genotype (unpublished) with comparable *L. dispar*, but not *P. vulgatissima* herbivory treatment.

**Table S4.** Nomenclature of Kunitz-type protease inhibitors reported in this study and their corresponding homologs as Potri-IDs from the *Populus trichocarpa* genome v3.0 and genes described in other studies. Similarity values (% sim) show the percentage of identical base pairs between the respective sequences with those published in our study based on their full-length open reading frame, unless stated otherwise.

| <u>Eberl et al. 2020</u> | <u><i>P. trichocarpa</i> genome</u> |       | <u>Ma et al. 2011<sup>1</sup></u> |       | <u>Philippe et al. 2009<sup>2</sup></u> |            | <u>Other studies</u>                        |          |
|--------------------------|-------------------------------------|-------|-----------------------------------|-------|-----------------------------------------|------------|---------------------------------------------|----------|
| Name ( <i>P. nigra</i> ) | Potri-ID                            | % sim | Name ( <i>P. nigra</i> )          | % sim | Name ( <i>P. spp</i> )                  | % sim      | Name ( <i>P. spp</i> )                      | % sim    |
| PnKTI A2                 | Potri.010G007800.1                  | 98.5  | -                                 | -     | PtxnKPI-A2                              | 98.5       | TI6 <sup>3</sup>                            | 97.7     |
| PnKTI A4                 | Potri.010G007900.1                  | 99.3  | -                                 | -     | PtxnKPI-A5/ PtxdKPI-A5                  | 99.3/ 99.2 |                                             |          |
| PnKTI A6                 | Potri.019G124400.1                  | 97.7  | PnKTI A6                          | 98.0  | PtxnKPI-C6.1/ PtxdKPI-C7*               | 99.5/ 99.5 | TI3 <sup>3</sup>                            | 98.0     |
| PnKTI A7                 | Potri.019G121900.1                  | 100   | PnKTI A7                          | 99.5  | PtxdKPI-C2.1                            | 99.5       |                                             |          |
| PnKTI A12                | Potri.003G097900.2                  | 100   | PnKTI A12                         | 99.2  | PtiKPI-2                                | 99.2       |                                             |          |
| PnKTI A13                | -                                   | -     | -                                 | -     | -                                       | -          |                                             |          |
| PnKTI A14                | Potri.T029200.1*                    | 92.2  | -                                 | -     | PtxdKPI-B5*/ PtxnKPI-B7*                | 98.3/ 97.1 | GWIN 3 <sup>4</sup> ; PnTIH1.1 <sup>5</sup> | 98.5/100 |
| PnKTI A15                | -                                   | -     | -                                 | -     | -                                       | -          |                                             |          |
| PnKTI B1                 | Potri.004G067800.1                  | 99.7  | PnKTI B1                          | 99.7  | PtiKPI-D1.2                             | 99.7       | TI4 <sup>3</sup>                            | 99.7     |
| PnKTI B2                 | Potri.004G067900.1                  | 99.1  | PnKTI B2                          | 98.9  | PtxdKPI-D2                              | 99.1       |                                             |          |
| PnKTI B5                 | -                                   | -     | -                                 | -     | PtxnKPI-D8                              | 100        |                                             |          |
| PnKTI C1                 | Potri.001G309900.1                  | 97.2  | PnKTI C1                          | 99.7  | -                                       | -          |                                             |          |
| PnKTI C3                 | Potri.007G111600.1                  | 99.2  | PnKTI C3                          | 99.2  | -                                       | -          |                                             |          |
| PnKTI C5                 | Potri.004G000400.1                  | 99.2  | PnKTI C5                          | 99.2  | PtxnKPI-F4                              | 99.3       |                                             |          |
| PnKTI C6                 | Potri.019G011000.1                  | 98.8  | PnKTI C6                          | 100   | -                                       | -          |                                             |          |
| PnKTI C7                 | Potri.007G111800.1                  | 96.6  | PnKTI C7                          | 96.7  | PtxdKPI-F9                              | 97.4       |                                             |          |
| PnKTI D2                 | Potri.019G088200.1                  | 97.9  | PnKTI D2*                         | 99.2  | PtxdKPI-E1                              | 99.4       | TI5 <sup>4</sup>                            | 99.2     |

<sup>1</sup> Ma Y, Zhao Q, Lu M-Z, Wang J (2011). *Tree Genetics & Genomes*, **7**: 431-441. <sup>2</sup> Philippe RN, Ralph SG, Külheim C, Jancsik SI, Bohlmann J (2009). *New Phytologist*, **184**: 865-884. <sup>3</sup> Major IT & Constabel CP (2008). *Plant Physiology*, **146**: 888-903. <sup>4</sup> Bradshaw HD, Hollick JB, Parsons TJ, Clarke HRG, Gordon MP. *Plant Molecular Biology*, **14**: 51-59. <sup>5</sup> Nishiguchi M, Yoshida K, Sumizono T, Tazaki K (2002). *Molecular Genetics and Genomics*, **4**: 506-514. \* incomplete ORF.

**Table S5.**  $C_q$  (quantification cycle) values of the qRT-PCR analysis for individual *KTI* genes in black poplar leaves without damage (Control) or after herbivory by lepidopteran caterpillars (*L. dispar*, *A. mogadorensis*) or adult beetles (*P. vulgatissima*). Shown are means  $\pm$  SEM for each treatment group ( $n = 6$ ).

| <b>Gene</b>             | <b>Control</b> | <b><i>L. dispar</i></b> | <b><i>A. mogadorensis</i></b> | <b><i>P. vulgatissima</i></b> |
|-------------------------|----------------|-------------------------|-------------------------------|-------------------------------|
| <b><i>PnKTI A6</i></b>  | 23 $\pm$ 0.3   | 19 $\pm$ 0.4            | 19 $\pm$ 0.7                  | 17 $\pm$ 0.3                  |
| <b><i>PnKTI A7</i></b>  | 31 $\pm$ 0.6   | 27 $\pm$ 1.0            | 28 $\pm$ 0.6                  | 26 $\pm$ 0.5                  |
| <b><i>PnKTI A13</i></b> | 31 $\pm$ 0.5   | 20 $\pm$ 0.8            | 21 $\pm$ 0.8                  | 17 $\pm$ 0.4                  |
| <b><i>PnKTI A14</i></b> | 27 $\pm$ 0.5   | 17 $\pm$ 0.8            | 17 $\pm$ 0.7                  | 14 $\pm$ 0.4                  |
| <b><i>PnKTI A15</i></b> | 25 $\pm$ 0.3   | 18 $\pm$ 0.5            | 18 $\pm$ 0.5                  | 16 $\pm$ 0.2                  |
| <b><i>PnKTI B1</i></b>  | 33 $\pm$ 0.7   | 27 $\pm$ 0.8            | 27 $\pm$ 0.8                  | 23 $\pm$ 0.8                  |
| <b><i>PnKTI B5</i></b>  | 36 $\pm$ 0.9   | 32 $\pm$ 0.6            | 31 $\pm$ 0.7                  | 28 $\pm$ 0.5                  |
| <b><i>PnKTI D2</i></b>  | 35 $\pm$ 0.4   | 25 $\pm$ 0.8            | 23 $\pm$ 0.8                  | 20 $\pm$ 0.6                  |
| <b><i>Actin</i>*</b>    | 20 $\pm$ 0.4   | 20 $\pm$ 0.2            | 20 $\pm$ 0.4                  | 20 $\pm$ 0.2                  |

\* house-keeping gene for normalization
